# Supplementary material for: An Ultrastretchable Electrical Switch Fiber with a Magnetic Liquid Metal Core for Remote Magnetic Actuation
Source: Polymers (Basel). 2021 Jul 22;13(15):2407. doi: 10.3390/polym13152407 (PMC8348917; doi:10.3390/polym13152407)
Supplement: Supplementary file 1 [file polymers-13-02407-s001.zip]

Archive with 5 entries (5 files):
- Supplementary materials_revised.pdf
- Video S1.mp4
- Video S2.mp4
- Video S3.mp4
- Video S4.mp4
