# Supplementary material for: An Ultrastretchable Electrical Switch Fiber with a Magnetic Liquid Metal Core for Remote Magnetic Actuation
Source: Polymers (Basel). 2021 Jul 22;13(15):2407. doi: 10.3390/polym13152407 (PMC8348917; doi:10.3390/polym13152407)
Supplement: Supplementary file 1 [file polymers-13-02407-s001.zip › Supplementary materials_revised.pdf]

## Supplementary Materials

### **Ultrastretchable Electrical Switch Fiber with Magnetic Liquid Metal Core for Remote Magnetic Actuation**

Kyeongmin Hong <sup>1</sup>, Minjae Choe <sup>1</sup>, Seoyeon Kim <sup>1</sup>, Hye-min Lee <sup>2</sup>, Byung-Joo Kim <sup>3</sup> and Sungjune Park <sup>1,\*</sup>

<sup>1</sup> Department of Polymer-Nano Science and Technology;  
Department of Nano Convergence Engineering,  
Jeonbuk National University, Jeonju, 54896, Korea

<sup>2</sup> R&D Division, Korea Institute of Carbon Convergence Technology,  
Jeonju 54853, Korea

<sup>3</sup> Department of Carbon-Nanomaterials Engineering,  
Jeonju University, 303 Cheonjam-ro, Jeonju 55069, Korea

E-mail: [s.park@jbnu.ac.kr](mailto:s.park@jbnu.ac.kr)

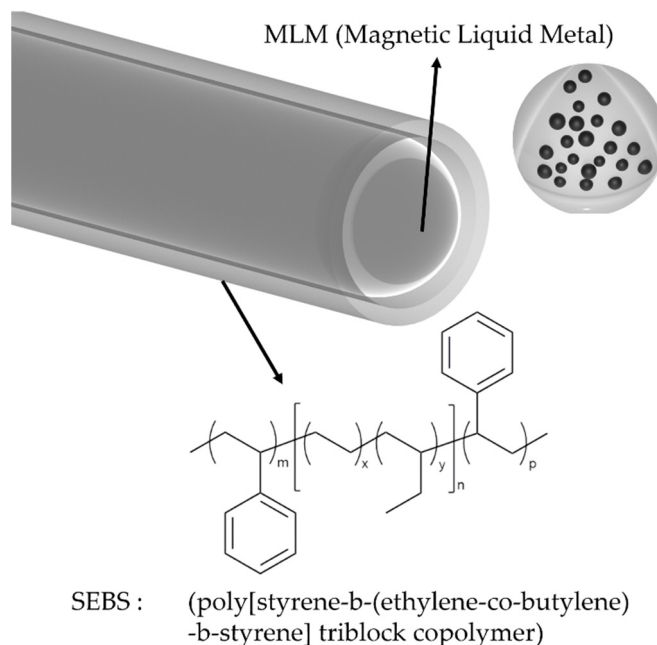

**Figure S1.** Schematic of MLM@SEBS fiber and the chemical structure of poly[styrene-b-(ethylene-co-butylene)-b-styrene] triblock copolymer (SEBS) fiber.

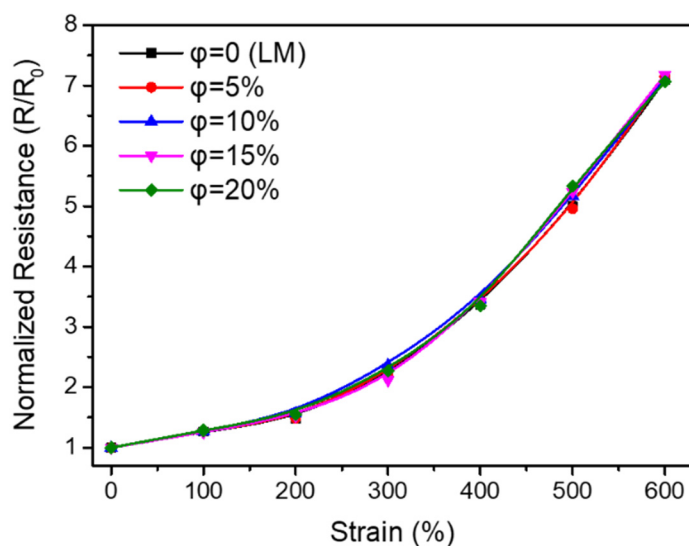

**Figure S2.** Normalized resistance changes of the LM@composite fiber and 5, 10, 15, and 20% MLM@composite fiber as a function of strain.

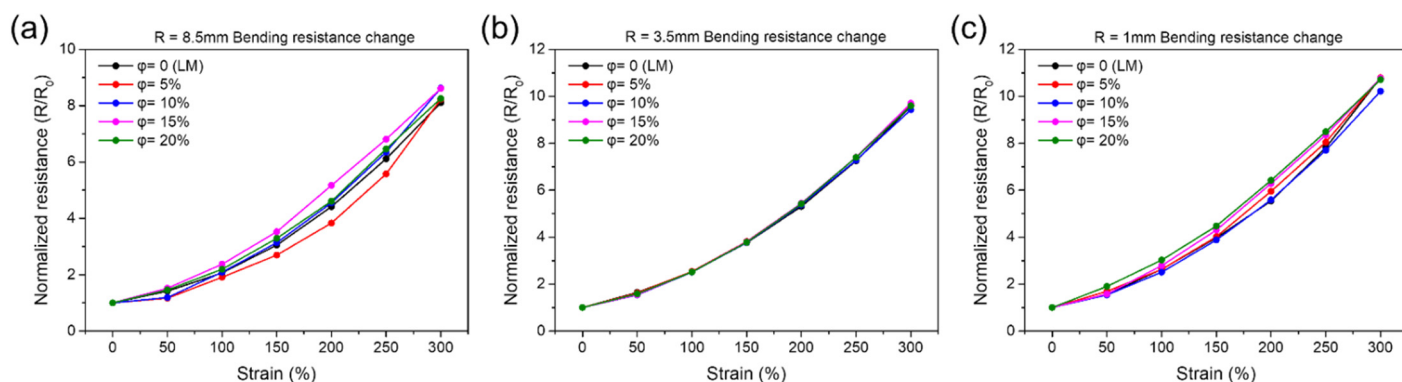

**Figure S3.** Normalized resistance changes of the LM@SEBS fiber and 5, 10, 15, and 20% MLM@SEBS fiber as a function of strain and bending radius (R), (a)  $R = 8.5\text{ mm}$ , (b)  $R = 3.5\text{ mm}$ , and (c)  $R = 1\text{ mm}$ .

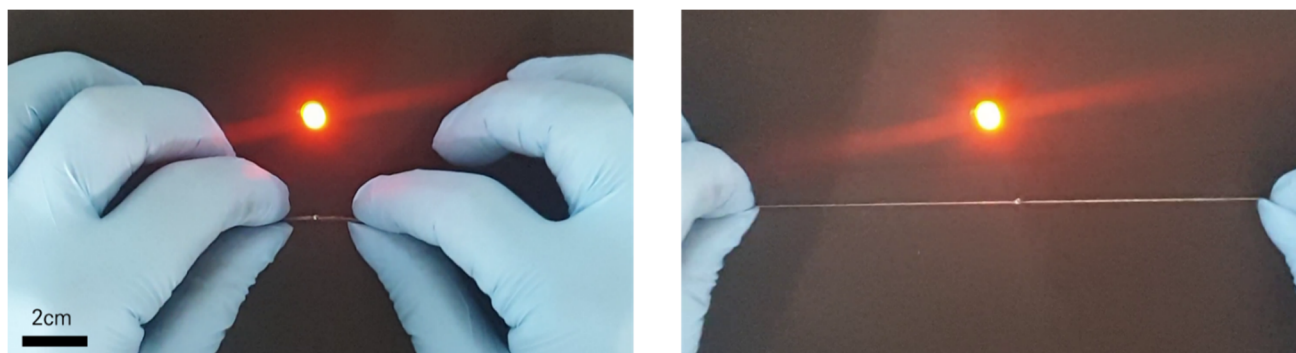

**Figure S4.** Stretching of a knotted 10% MLM@SEBS fiber to 600% strain while maintaining conductivity.

### **Supplementary Video List**

**Video S1.** Stretching of a 5 cm 10% MLM@SEBS fiber to 25 cm while maintaining conductivity.

**Video S2.** Stretching of a knotted 10% MLM@SEBS fiber to 600% strain while maintaining conductivity.

**Video S3.** Activation of a LED by contact with a MLM@SEBS fiber via remote magnetic actuation.

**Video S4.** Switching three LEDs by contact with a MLM@SEBS fiber via remote magnetic actuation.
